# Supplementary material for: Transcriptional silencing and activation of paternal DNA during P lasmodium berghei zygotic development and transformation to oocyst
Source: PubMed Central journal article supplement (PMC4678591; doi:10.1111/cmi.12433), 2015-03-30
Supplement: NIHMS64980-supplement-Supplementary_Table_S1.pdf [file NIHMS64980-supplement-Supplementary_Table_S1.pdf]

**Table S1.** Parasite development in *A. gambiae* mosquitoes co-infected with parasites expressing GFP and mCHERRY

| Parasite lines                                           | Time point (hpi) | Number of midguts | Number of GFP parasites | Number of mCHERRY parasites | Number of GFP/mCHERRY double-positive parasites | P-value        |                        |                            |
|----------------------------------------------------------|------------------|-------------------|-------------------------|-----------------------------|-------------------------------------------------|----------------|------------------------|----------------------------|
|                                                          |                  |                   |                         |                             |                                                 | GFP vs mCHERRY | GFP vs double-positive | mCHERRY vs double-positive |
| <i>wt_green230p</i> X <i>wt_red230p</i>                  | 24               | 25                | 1143                    | 962                         | 0                                               | 0.2945         | <0.001                 | <0.001                     |
|                                                          | 48               | 20                | 428                     | 278                         | 358                                             | 0.0754         | 0.3792                 | 0.7429                     |
| $\Delta p47\_green230p$ X <i>wt_red230p</i>              | 24               | 32                | 0                       | 1028                        | 0                                               | <0.001         | 1                      | <0.001                     |
|                                                          | 48               | 41                | 0                       | 1253                        | 631                                             | <0.001         | <0.001                 | <0.05                      |
| $\Delta p48/45\_green230p$ X <i>wt_red230p</i>           | 24               | 26                | 568                     | 1658                        | 0                                               | <0.001         | <0.001                 | <0.001                     |
|                                                          | 48               | 49                | 87                      | 1468                        | 599                                             | <0.001         | <0.001                 | <0.01                      |
| <i>wt_green<sub>ssu</sub></i> X <i>wt_red230p</i>        | 24               | 30                | 1736                    | 1513                        | 0                                               | 0.3254         | <0.001                 | <0.001                     |
|                                                          | 48               | 25                | 657                     | 628                         | 880                                             | 0.6761         | 0.2400                 | 0.1480                     |
| <i>wt_green230p</i> X <i>wt_hsp70<sub>p</sub>red230p</i> | 24               | 16                | 931                     | 1456                        | 0                                               | <0.05          | <0.001                 | <0.001                     |
|                                                          | 48               | 11                | 330                     | 333                         | 682                                             | 1              | <0.001                 | <0.001                     |

This table reports parasite numbers at 24 and 48 hours post infection (hpi) from the direct feed of mosquitoes with the mCHERRY expressing parasites *wt\_red230p* or *wt\_hsp70<sub>p</sub>red230p* and either of the following GFP expressing parasites; *wt\_green230p* or *wt\_green<sub>ssu</sub>* or  $\Delta p47\_green230p$  or  $\Delta p48/45\_green230p$ . A mouse was co-infected with the two parasite lines and mosquitoes were fed on this mouse. Total numbers of green, red and yellow parasites were counted from three independent biological experiments. P-values were calculated using the Mann-Whitney *U*-test.
