# Supplementary material for: Transcriptional silencing and activation of paternal DNA during P lasmodium berghei zygotic development and transformation to oocyst
Source: PubMed Central journal article supplement (PMC4678591; doi:10.1111/cmi.12433), 2015-03-30
Supplement: NIHMS64980-supplement-Supplementary_Table_S2.pdf [file NIHMS64980-supplement-Supplementary_Table_S2.pdf]

**Table S2.** Oocyst numbers in *A. gambiae* infections.

| Time   | Parasite                   | Number of exp | Number of midguts | Prevalence (%) | Parasite density |        | Parasite Range | <i>P</i> -value |
|--------|----------------------------|---------------|-------------------|----------------|------------------|--------|----------------|-----------------|
|        |                            |               |                   |                | Arithmetic mean  | Median |                |                 |
| Day 10 | <i>wt_green230p</i>        | 2             | 60                | 90             | 39.8             | 34     | 0-149          | <0.0001         |
|        | $\Delta p48/45\_green230p$ | 2             | 61                | 13             | 0.24             | 0      | 0-4            |                 |

This table reports oocyst numbers derived from two biological replicates of infection of *A. gambiae* mosquitoes with the *wt\_green230p* or the male gamete deficient transgenic parasite,  $\Delta p48/45\_green230p$ . P-value was calculated using the Mann-Whitney *U*-test.
