# Supplementary material for: Transcriptional silencing and activation of paternal DNA during P lasmodium berghei zygotic development and transformation to oocyst
Source: PubMed Central journal article supplement (PMC4678591; doi:10.1111/cmi.12433), 2015-03-30
Supplement: NIHMS64980-supplement-Supplementary_Table_S3.pdf [file NIHMS64980-supplement-Supplementary_Table_S3.pdf]

**Table S3.** *In vitro* cross-fertilization assays of GFP and mCHERRY expressing parasites

| Parasite lines                                                                              | Time point (hpi) | Number of GFP parasites | Number of mCHERRY parasites | Number of GFP/mCHERRY double-positive parasites | <i>P</i> -value |                        |                            |
|---------------------------------------------------------------------------------------------|------------------|-------------------------|-----------------------------|-------------------------------------------------|-----------------|------------------------|----------------------------|
|                                                                                             |                  |                         |                             |                                                 | GFP vs mCHERRY  | GFP vs double-positive | mCHERRY vs double-positive |
| <i>wt_cht<sub>p</sub>green<sub>230p</sub></i> X <i>wt_cht<sub>p</sub>red<sub>230p</sub></i> | 24               | 83                      | 46                          | 72                                              | 0.0537          | 0.5914                 | 0.0505                     |
| <i>wt_ctr<sub>p</sub>green<sub>ssu</sub></i> X <i>wt_cht<sub>p</sub>red<sub>230p</sub></i>  | 24               | 121                     | 41                          | 72                                              | 0.0510          | 0.0500                 | 0.7174                     |

This table reports parasite numbers at 24 h in *in vitro* cross-fertilization assays of the mCHERRY ookinete-expressing parasite (*wt\_cht<sub>p</sub>green<sub>230p</sub>*) and either of the following ookinete stage GFP expressing parasites; *wt\_cht<sub>p</sub>green<sub>230p</sub>* or *wt\_ctr<sub>p</sub>green<sub>ssu</sub>*. A mouse was co-infected with the two parasites and total numbers of green, red and yellow parasites were then counted. Total numbers of green, red and yellow parasites were counted from three independent biological experiments. *P*-values were calculated using the Mann-Whitney *U*-test.
