# Supplementary material for: Transcriptional silencing and activation of paternal DNA during P lasmodium berghei zygotic development and transformation to oocyst
Source: PubMed Central journal article supplement (PMC4678591; doi:10.1111/cmi.12433), 2015-03-30
Supplement: NIHMS64980-supplement-Supplementary_Table_S4.pdf [file NIHMS64980-supplement-Supplementary_Table_S4.pdf]

**Table S4.** Parasite development in *A. gambiae* mosquitoes co-infected with parasites expressing GFP and mCHERRY

| Time point | Parasite lines                                                                                 | Number of exps | Number of midguts | Number of GFP parasites | Number of mCHERRY parasites | Number of GFP/mCHERRY double positive parasites | P-value        |                        |                            |
|------------|------------------------------------------------------------------------------------------------|----------------|-------------------|-------------------------|-----------------------------|-------------------------------------------------|----------------|------------------------|----------------------------|
|            |                                                                                                |                |                   |                         |                             |                                                 | GFP vs mCHERRY | GFP vs double-positive | mCHERRY vs double-positive |
| 24h        | <i>wt_cht<sub>p</sub>green<sub>230p</sub></i> X<br><i>wt_cht<sub>p</sub>red<sub>230p</sub></i> | 3              | 25                | 785                     | 257                         | 418                                             | 0.0273         | 0.1149                 | 0.0927                     |
| 24h        | <i>wt_ctrp<sub>p</sub>green<sub>ssu</sub></i> X<br><i>wt_cht<sub>p</sub>red<sub>230p</sub></i> | 3              | 25                | 500                     | 423                         | 609                                             | 0.2984         | 0.5634                 | 0.1748                     |

This table reports parasite numbers at 24 hours post infection (hpi) from the direct feed of mosquitoes with the ookinete stage mCHERRY expressing parasite *wt\_cht<sub>p</sub>red<sub>230p</sub>* and either of the following ookinete stage GFP expressing parasites; *wt\_cht<sub>p</sub>green<sub>230p</sub>* or *wt\_ctrp<sub>p</sub>green<sub>ssu</sub>*. A mouse was co-infected with the two parasites and mosquitoes were fed on this mouse. Total numbers of green, red and yellow parasites were then counted. *P*-values were calculated using the Mann-Whitney *U*-test.
