# Supplementary material for: Transcriptional silencing and activation of paternal DNA during P lasmodium berghei zygotic development and transformation to oocyst
Source: PubMed Central journal article supplement (PMC4678591; doi:10.1111/cmi.12433), 2015-03-30
Supplement: NIHMS64980-supplement-Supplementary_Table_S5.pdf [file NIHMS64980-supplement-Supplementary_Table_S5.pdf]

**Table 5.** Primers for the generation of transgenic parasites and RT-PCR

| <b>Primer name</b>            | <b>Sequence (5' to 3')</b>                            | <b>Description</b> |
|-------------------------------|-------------------------------------------------------|--------------------|
| <i>Chtp</i> F (P1)            | CCC <u><i>CTAAG</i></u> TTTTTTATGGTGTGGAAAAAATAGCCA   | AflII              |
| <i>Chtp</i> R (P2)            | CGG <u><i>GATC</i></u> CTTTTTCTAAATTTTGTAAGTATATTTAAA | BamHI              |
| <i>mCherry</i> F (P3)         | <u><i>GGATCC</i></u> ATGGTGAGCAAGGGCGAGGAGG           | BamHI              |
| <i>mCherry</i> R (P4)         | <u><i>GGATCC</i></u> TACTTGTACAGCTCGTCCATG            | BamHI              |
| 230p INT F (P5)               | CAATATGTAATTTTGACTATAAT                               |                    |
| <i>Tgdhfr/ts</i> 5'UTR R (P6) | GATGTGTTATGTGATTAATTCATACAC                           |                    |
| 230p WT R (P7)                | GGCGGTAATTGAAAAATAAAG                                 |                    |
| <i>gfp</i> RT-PCR F           | CCTGTCCTTTTACCAGACAACCA                               |                    |
| <i>gfp</i> RT-PCR R           | GGTCTCTCTTTTCGTTGGGATCT                               |                    |
| <i>Tub</i> RT-PCR F           | TTTTGCCTAGAACACGGAATCC                                |                    |
| <i>Tub</i> RT-PCR R           | TACATCACCACCTGCCACAA                                  |                    |

Where appropriate, target restriction sites are shown as underlined italics. The appropriate restriction enzyme is presented in the description column. F, forward; R, reverse. All primers are shown in a 5' to 3' direction.
